# Supplementary material for: Effects of Kifunensine on Production and N-Glycosylation Modification of Butyrylcholinesterase in a Transgenic Rice Cell Culture Bioreactor
Source: MDPI journal article supplement (doi:10.3390/ijms21186896), 2020-09-20
Supplement: s1 [file s1]

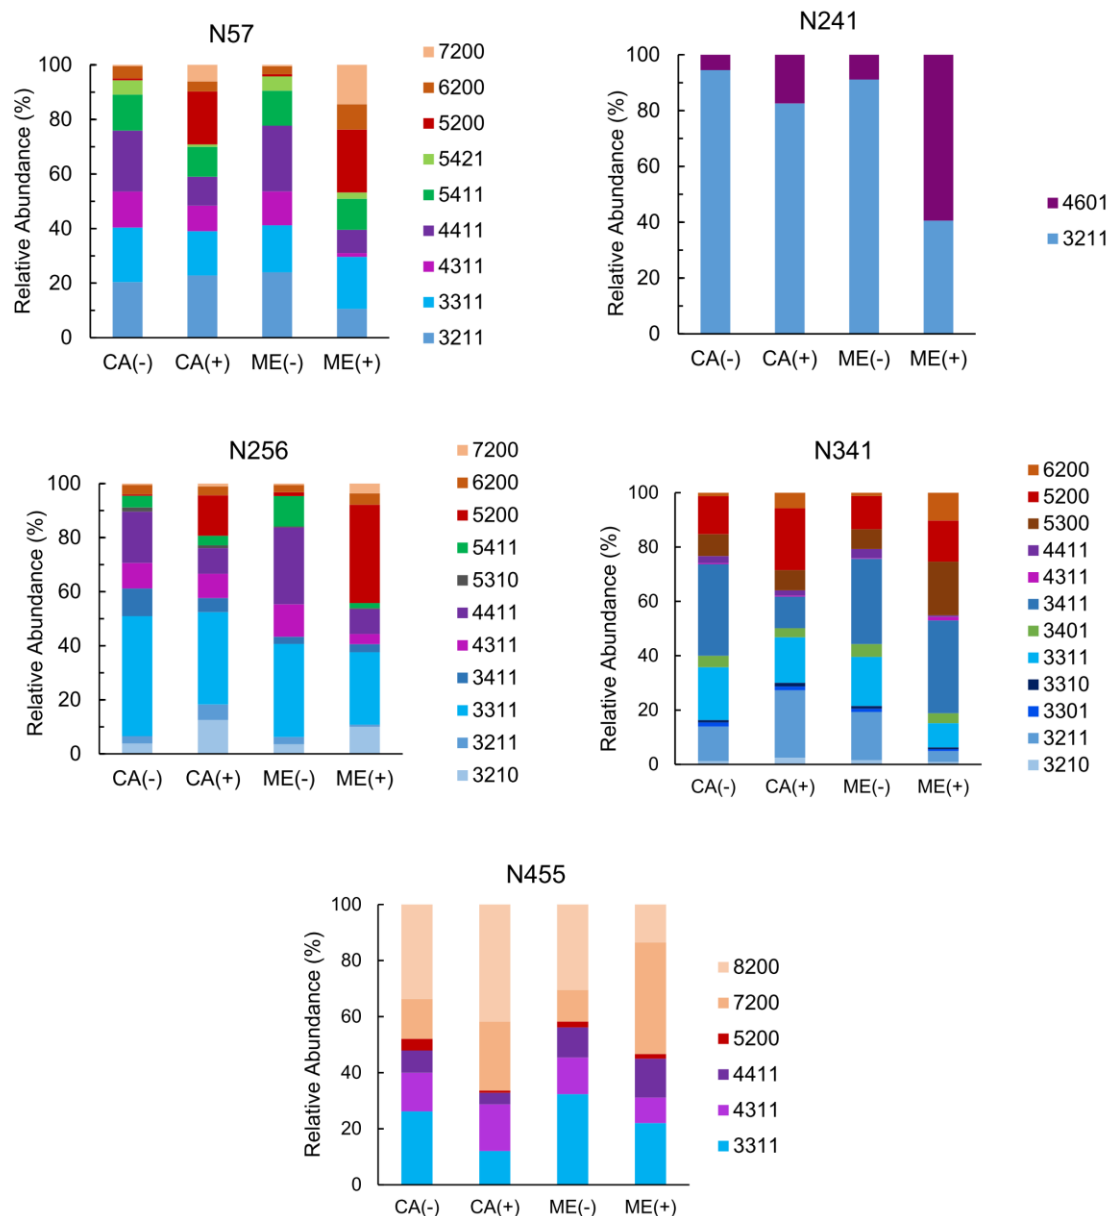

**Figure S1.** Site-specific N-glycan analysis of purified cell-associated rrBChE and culture medium rrBChE with and without kifunensine treatment. Glycoform distribution of each site analyzed by LC-MS/MS representing in % relative abundance; CA(-) and CA(+), cell-associated rrBChE with/without kifunensine treatment, respectively; ME(-) and ME(+), culture medium rrBChE with/without kifunensine treatment, respectively. CA and ME stand for cell-associated rrBChE and culture medium rrBChE, respectively, while + and - refer to with and without kifunensine treatment, respectively.
